# Supplementary material
Source: PubMed Central journal article supplement (PMC6884683)
Supplement: NIHMS1534049-supplement-1.pdf [file NIHMS1534049-supplement-1.pdf]

*Supplemental Figure 1: Magnetic Capture Procedure*

*Supplemental Figure 2: Experimental Flow Chart for the Magnetic Capture Validation Experiments*

*Supplemental Figure 3: Experimental Flow Chart for Studying the Effects of Age on the Severity of Joint Damage and Intra-articular Inflammation Following MCLT+MMT Surgery in the Rat*

*Supplemental Figure 4: Particle Collection Efficiency*

Supplemental Figure 1

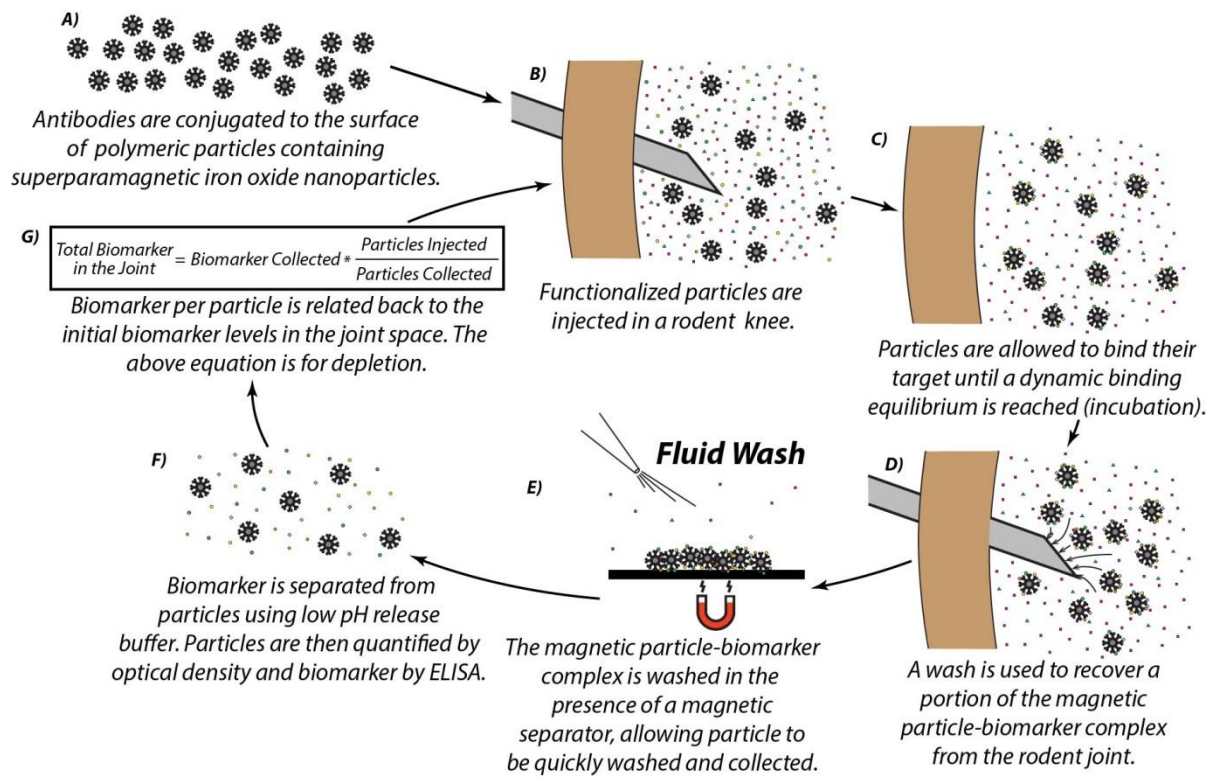

## Supplemental Figure 2

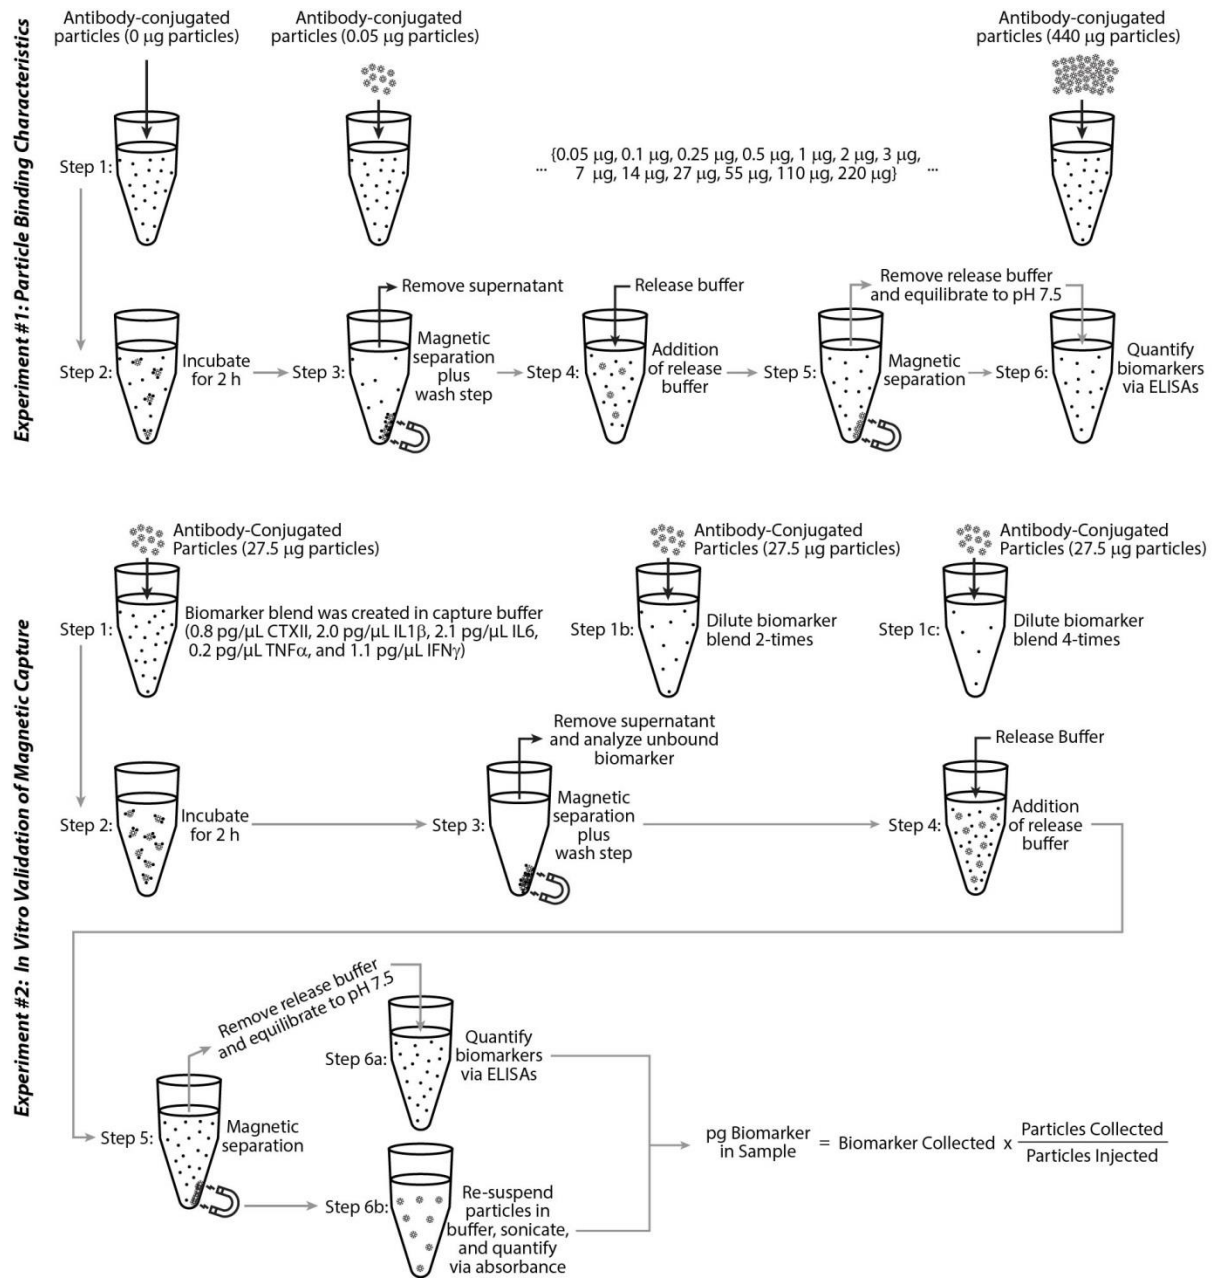

Supplemental Figure 3

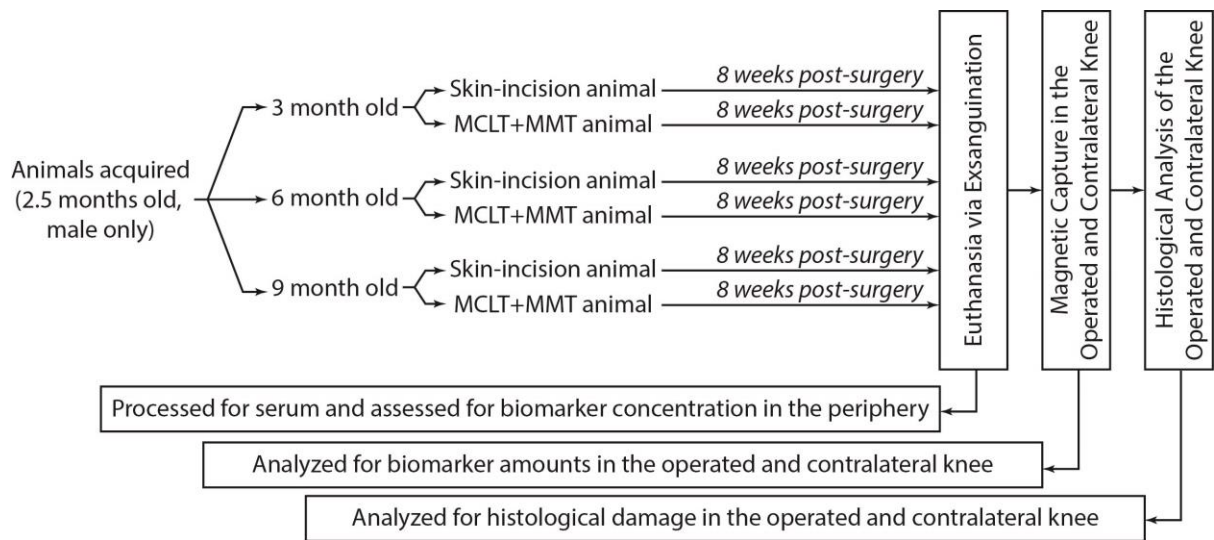

Supplemental Figure 4

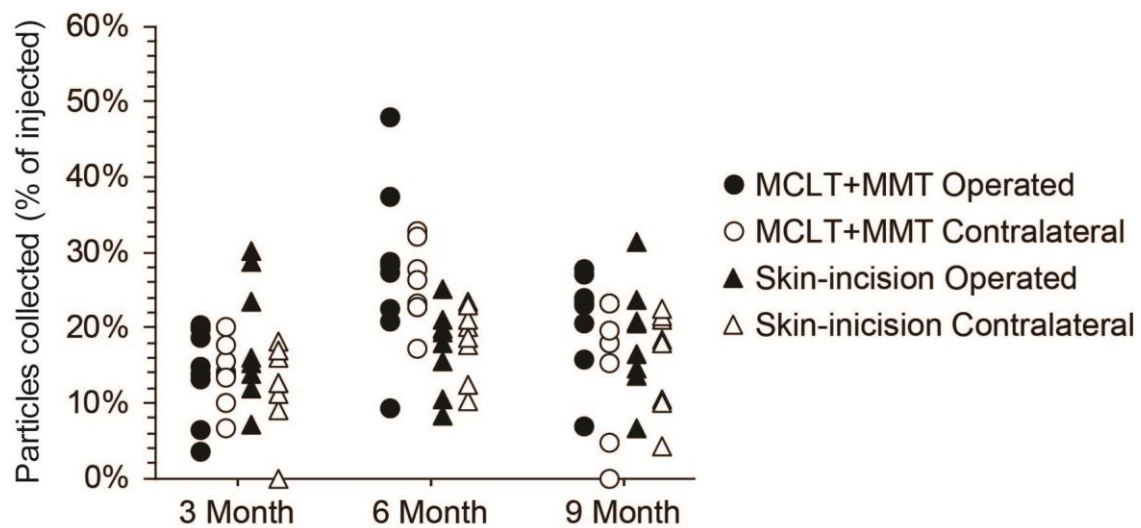

Supplementary Table 1

|                             | <i>Cartilage Area</i> | <i>Cartilage Damage</i> | <i>Total Affected Cartilage Width</i> | <i>Cartilage Matrix Loss Width</i> | <i>Hypertrophic Cartilage Damage</i> | <i>Osteophyte Area</i> | <i>Tibial Plateau Width</i> | <i>Medial Capsule Width</i> |
|-----------------------------|-----------------------|-------------------------|---------------------------------------|------------------------------------|--------------------------------------|------------------------|-----------------------------|-----------------------------|
| <b>Knee</b>                 | <b>&lt;0.0001</b>     | <b>&lt;0.0001</b>       | <b>&lt;0.0001</b>                     | <b>&lt;0.0001</b>                  | <b>&lt;0.0001</b>                    | <b>&lt;0.0001</b>      | <b>0.0003</b>               | <b>0.0044</b>               |
| <b>Age</b>                  | <b>0.0003</b>         | <b>0.0184</b>           | <b>0.0009</b>                         | Not Sig.                           | Not Sig.                             | <b>0.0011</b>          | Not Sig.                    | Not Sig.                    |
| <b>Surgery</b>              | <b>0.0009</b>         | <b>&lt;0.0001</b>       | <b>&lt;0.0001</b>                     | <b>&lt;0.0001</b>                  | <b>&lt;0.0001</b>                    | <b>0.0031</b>          | <b>0.0002</b>               | Not Sig.                    |
| <b>Knee x Age</b>           | Not Sig.              | <b>0.0184</b>           | <b>0.0134</b>                         | Not Sig.                           | Not Sig.                             | Not Sig.               | Not Sig.                    | Not Sig.                    |
| <b>Knee x Surgery</b>       | <b>&lt;0.0001</b>     | <b>&lt;0.0001</b>       | <b>&lt;0.0001</b>                     | <b>&lt;0.0001</b>                  | <b>&lt;0.0001</b>                    | <b>&lt;0.0001</b>      | Not Sig.                    | <b>0.0445</b>               |
| <b>Surgery x Age</b>        | Not Sig.              | <b>0.0184</b>           | Not Sig.                              | Not Sig.                           | Not Sig.                             | Not Sig.               | Not Sig.                    | <b>0.0261</b>               |
| <b>Knee x Age x Surgery</b> | Not Sig.              | <b>0.0184</b>           | Not Sig.                              | Not Sig.                           | Not Sig.                             | Not Sig.               | Not Sig.                    | Not Sig.                    |
